# Supplementary material for: Global burden of disease study on COPD in the older adult: comprehensive analysis of environmental factors and interaction effects
Source: Front Public Health. 2025 May 30;13:1597793. doi: 10.3389/fpubh.2025.1597793 (PMC12162481; doi:10.3389/fpubh.2025.1597793)
Supplement: Supplementary file 2 [file Table_2.XLSX]

## Sheet: Sheet1
	Ambient particulate matter pollution			Household air pollution from solid fuels			Ambient ozone pollution			Low temperature			High temperature
location	1990	2021	AAPC	1990	2021	AAPC	1990	2021	AAPC	1990	2021	AAPC	1990	2021	AAPC
Global	1384.69[919.53,2023.59]	1364.67[981.69,1687.82]	-0.23[-0.65,0.2]	4181.29[3306.4,4993.5]	1134.03[675.61,1903.06]	-4.19[-4.39,-3.98]	815.6[178.21,1434.12]	694.12[151.79,1190.36]	-0.5[-0.92,-0.08]	838.22[700.06,983.87]	411.38[324.46,504.24]	-2.38[-3.26,-1.49]	49.08[-22.1,161.32]	53.3[-10.54,146.6]	0.74[0.23,1.24]
High SDI	616.95[406.75,880.1]	255.12[176.88,339.4]	-2.83[-3.1,-2.56]	113.82[41.77,238.07]	0.93[0,8.07]	-14.45[-14.87,-14.02]	241.11[51.84,418.31]	165.15[36.01,287.22]	-1.17[-1.69,-0.64]	372.73[328.44,409.61]	262.82[230.2,288.16]	-1.45[-1.57,-1.33]	6.33[-13.32,32.03]	8.09[-9.75,33.44]	1.2[0.49,1.91]
High-middle SDI	1747.56[1089.58,2688.58]	1193.66[917.1,1492.22]	-1.31[-1.57,-1.05]	3733.37[2658.37,4753.91]	92.63[3.72,561.62]	-11.38[-12.24,-10.51]	882.01[188.31,1539.54]	399.49[81.93,706.58]	-2.46[-3.01,-1.9]	1086.21[924.9,1246.42]	425.74[348.55,509.24]	-3.01[-3.8,-2.21]	35.67[-30.95,137.24]	20.25[-18.94,74.69]	-1.94[-2.59,-1.27]
Middle SDI	2109.54[1237.94,3375.26]	2067.27[1460.05,2555.67]	-0.28[-1,0.44]	8311.41[6539.39,9884.74]	775.18[157.12,2187.76]	-7.48[-8.29,-6.66]	1314.28[282.35,2301.68]	663.66[145.57,1151.1]	-2.23[-2.96,-1.5]	1534.78[1262.51,1811.52]	557.3[440.54,688.71]	-3.25[-4.41,-2.07]	51.77[-41.85,184.91]	45.29[-9.68,123.2]	-0.31[-0.88,0.26]
Low-middle SDI	1463.93[858.85,2268.11]	2405.51[1404.31,3324.12]	1.61[0.86,2.36]	7341.6[5759.15,9041.8]	4416.19[2853.85,6234.13]	-1.61[-2.04,-1.18]	1183.13[229.22,2155.52]	1975.43[429.55,3352.97]	1.85[1.11,2.6]	493.77[244.09,803.63]	416.56[190.49,677.69]	-0.48[-0.77,-0.2]	160.99[-16.69,442.74]	192.4[-12.32,479.08]	1.15[0.58,1.71]
Low SDI	1173.61[699.62,1794.51]	1448.66[929,2055.62]	0.57[-0.06,1.21]	6455.29[5036.51,7967.87]	5304.95[4174.15,6444.15]	-0.59[-0.81,-0.37]	1096.87[210.2,2010.72]	1613.36[341.56,2777.93]	1.34[0.38,2.31]	463.75[267.26,693.51]	389.13[219.52,583.04]	-0.8[-2.53,0.95]	92.71[-23.45,282.08]	113.54[-22.19,312.13]	0.06[-2.61,2.8]
Western Europe	611.96[281.59,1049.35]	196.56[132.96,266.21]	-3.72[-3.92,-3.51]	3.77[0.03,31.72]	0.13[0,1.09]	-10.32[-10.98,-9.66]	193.88[42.77,338.7]	139.33[30.63,243.18]	-0.99[-2.31,0.35]	369.35[322.86,420.96]	260.03[224.75,297.75]	-1.41[-1.73,-1.09]	0.23[-7.22,7.49]	1.09[-3.65,6.47]	NS
Central Europe	944.14[519.99,1481.33]	372.25[288.61,466.72]	-3[-3.32,-2.67]	459.77[119.89,1362.02]	30.99[0.78,228.12]	-8.44[-9.11,-7.77]	365.88[80.2,646.57]	123.2[26.49,220.55]	-3.79[-5.08,-2.48]	456.36[402.37,515.07]	254.29[220.68,286.2]	-2.29[-2.64,-1.94]	0.72[-16.57,20.22]	4.33[-10.59,22.92]	NS
Eastern Europe	1180.65[525.63,1936.94]	183.63[112.3,269.68]	-5.78[-6.49,-5.07]	115.8[27.31,448.46]	9.12[1.18,45.12]	-7.94[-8.94,-6.93]	387.54[80.31,688.74]	53.68[11.02,98.12]	-6.18[-6.89,-5.47]	520.02[459.59,556.41]	167.21[139.35,192.9]	-3.73[-4.66,-2.79]	-0.75[-11.01,9.01]	2.21[-5.36,9.51]	NS
East Asia	3620.07[1709.54,6512.6]	2543.03[1821.55,3219.73]	-1.19[-1.41,-0.98]	14425.5[10996.48,17501.45]	812.89[208.82,2460.74]	-8.96[-9.81,-8.1]	2395.5[506.43,4201.66]	738.91[152.35,1325.66]	-3.83[-4.41,-3.25]	2988.53[2445.8,3509.32]	862.74[686.05,1061.38]	-4.16[-5.33,-2.98]	99.22[-90.78,377.86]	40.55[-31.91,142.06]	-3.03[-3.82,-2.24]
Central Asia	814[373.32,1504.82]	636.58[446.26,832.58]	-0.8[-1.76,0.17]	947.78[419.93,1821.02]	185.11[85.85,396.89]	-5.13[-5.54,-4.72]	539.61[107.32,942.18]	262.84[50.85,488.7]	-2[-2.75,-1.24]	542.24[468.57,601.68]	317.05[270.93,366.57]	-1.71[-2.83,-0.58]	12.81[-22.2,50.75]	20.05[-10.55,54.69]	1.84[-1.04,4.8]
South Asia	2001.62[1065.07,3252.44]	3404.55[2184.16,4506.08]	1.61[0.7,2.52]	9167.1[7061.6,11469.76]	4930.75[3264.05,6956.34]	-2.05[-2.42,-1.69]	1691.91[323.39,3089.17]	2664.09[578.19,4523.65]	1.55[0.87,2.24]	587.97[229.47,1025.46]	504.15[192.77,851.05]	-0.43[-0.79,-0.08]	219.35[-37.92,612.48]	237.57[-28.77,604.36]	0.83[0.24,1.43]
Southeast Asia	1010.49[450.07,1832.37]	1040.73[703.84,1370.61]	0.07[-0.17,0.31]	4226.27[3130.43,5304.99]	1189.27[482.85,2263.42]	-4.07[-4.29,-3.85]	148.34[27.89,296.74]	307.27[61.37,559.66]	2.4[-1.61,6.56]	103.44[50.43,164.14]	62.79[34.38,94.25]	-2.1[-2.5,-1.69]	19.52[-4.73,42.23]	32.64[16.42,61.21]	NS
High-income North America	495.31[178.49,891.38]	172.85[82.28,276.22]	-3.2[-3.91,-2.49]	0.38[0,2.69]	0.07[0,0.39]	-5.31[-5.61,-5.01]	360.45[79.44,624.34]	241.07[52.51,420.75]	-1.18[-1.59,-0.76]	385.25[328.44,423.21]	388.84[332.83,429.73]	-0.04[-0.34,0.26]	8.16[-26.43,49.94]	16.38[-21.57,72.66]	2.52[1.4,3.66]
Tropical Latin America	695.23[263.48,1324.28]	351.03[199,536.83]	-2.11[-2.51,-1.72]	1017.69[444.71,1945.6]	84.69[12.81,301.2]	-7.79[-8.25,-7.32]	142.61[31.47,267.65]	220.9[48.48,390.94]	1.74[-0.68,4.23]	245.84[180.02,307.34]	138.97[102.87,174.71]	-1.63[-3.25,0.03]	-3.57[-15.17,18.48]	0.02[-5.51,11.5]	NS
Andean Latin America	822.81[397.09,1314.72]	377.03[238.56,560.68]	-2.34[-2.92,-1.75]	639.96[296.24,1090.35]	92.44[15.81,303.81]	-6.09[-6.54,-5.64]	41.51[7.97,84.72]	67.05[13.5,134.03]	1.9[-1.67,5.6]	190.79[150.23,234.16]	121.37[87.95,161.9]	-1.32[-1.54,-1.1]	-2.3[-4.58,-0.91]	-0.31[-2.03,2.15]	NS
Central Latin America	1046.94[593.76,1638.74]	426.23[302.33,567.49]	-2.71[-3.18,-2.23]	580.19[218.9,1255.26]	165.16[50.12,496.26]	-4.04[-4.32,-3.76]	460.37[105.68,765.33]	152.42[33.34,273.53]	-3.48[-4.97,-1.96]	304.47[256.15,341.1]	192.76[158.17,221.04]	-1.72[-2.09,-1.35]	-2.15[-8.57,6.21]	5.97[-1.02,16.41]	NS
Southern Latin America	559.79[289.42,979.91]	371.98[210.47,585.77]	-1.18[-1.7,-0.66]	235.49[51.13,614.9]	9.84[0.03,95.61]	-9.83[-10.43,-9.23]	97.24[19.28,195.85]	94.3[18,186.74]	-0.01[-0.28,0.27]	382.49[322.1,431.96]	294.82[254.36,331.44]	-0.62[-1.04,-0.2]	2.63[-5.92,14.24]	1.7[-5.86,12.51]	1.68[0.28,3.11]
Central Sub-Saharan Africa	581.06[310.13,984.44]	541.36[326.36,832.82]	-0.23[-0.49,0.02]	4443.91[2976.06,6295.62]	3435.08[2165.11,5349.65]	-0.84[-0.97,-0.72]	498.37[83.81,972.2]	564.16[96.82,1160.29]	0.15[-2.25,2.6]	151.36[87.92,239.07]	106.07[62.17,173.77]	-1.54[-1.85,-1.24]	-29.1[-102.53,-7.92]	-14.46[-36.45,4.89]	NS
Eastern Sub-Saharan Africa	334.02[212.24,490.75]	307.36[193.2,462.21]	-0.19[-0.58,0.2]	3855.18[2970.29,4643.23]	2752.7[2155.9,3348.96]	-1.1[-1.16,-1.04]	177.98[33.1,336.64]	282.03[55.85,517.31]	1.46[-1.81,4.85]	316.5[222.85,401.76]	195.45[148.16,248.38]	-1.76[-2.24,-1.29]	4.74[-7.49,18.85]	7.64[-1.96,24.49]	2.57[0.18,5.01]
Western Sub-Saharan Africa	692.92[410.65,1043.94]	642.06[373.78,957.46]	-0.26[-0.86,0.34]	2201.94[1644.4,2766.72]	1583.44[1117.47,2096.7]	-1.07[-1.23,-0.91]	240.1[46.47,441.43]	321.63[68.78,571.94]	0.85[-1.52,3.27]	35.03[8.33,65.79]	16.66[4.58,30.57]	-2.09[-2.72,-1.47]	58.14[25.87,110.3]	67.42[35.52,121.64]	1.22[0.71,1.73]
Southern Sub-Saharan Africa	899.57[629.01,1189.56]	899.8[659.08,1166.94]	0.04[-0.44,0.53]	1417.19[756.78,2253.76]	586.16[319.38,1093.95]	-2.84[-3.21,-2.47]	131.92[24.61,244.4]	258.58[53.53,462]	2.07[-1.7,5.98]	457.19[369.44,571.49]	432.18[360.01,505.54]	-0.19[-0.74,0.36]	-0.29[-10.98,14.92]	0.96[-9.98,15.86]	NS
North Africa and Middle East	1115.27[795.64,1452.92]	995.66[782.65,1232.6]	-0.5[-0.99,0]	715.45[396.24,1276.38]	145.2[97.04,213.26]	-5.03[-5.1,-4.97]	523.2[99.97,955.36]	385.93[82.03,682.46]	-0.92[-1.13,-0.72]	430.19[310.13,547.11]	291.16[226.46,354.72]	-1.3[-1.67,-0.93]	47.94[-12.06,136.92]	52.7[-3.39,133.57]	0.06[-0.29,0.4]
Australasia	183.59[5.56,521.03]	147.69[85.52,214.88]	-1.1[-2.85,0.68]	3.9[0,36.98]	0.14[0,0.83]	-10.37[-11.01,-9.73]	37.61[6.14,89.32]	36.24[6.36,78.05]	0.03[-0.91,0.97]	404.77[334.59,460.37]	233.62[196.11,267.48]	-1.91[-2.4,-1.42]	3.15[-8.14,18.21]	1.62[-3.34,9.31]	0.37[-1.87,2.65]
High-income Asia Pacific	281.85[77.17,570.91]	167.63[99.89,249.65]	-1.75[-2.02,-1.49]	5.17[0.34,29.44]	0.07[0,0.5]	-13.24[-13.74,-12.75]	96.96[20.74,173.39]	82.36[17.62,145.77]	-0.58[-2.03,0.9]	196.06[167.41,218.41]	86.53[71.59,99.54]	-2.75[-3.48,-2.02]	3.38[-8.02,16.43]	1.69[-3.62,8.26]	NS
Caribbean	297.61[119.92,602.97]	376.45[188.79,632.31]	0.86[0.37,1.35]	527.74[282.35,793.6]	345.18[161.82,562.86]	-1.34[-1.47,-1.21]	92.99[16.42,178.66]	70.55[12.23,137.62]	-0.86[-3.32,1.65]	17.69[6.69,28.65]	18.29[7.81,28.13]	-0.45[-1.62,0.74]	-2.55[-6.92,-0.48]	-0.67[-2.9,3.31]	NS
Oceania	1077[291.12,2731.25]	1122.86[382.47,2637.84]	0.16[0.02,0.3]	11289.87[7937.14,15100.84]	8397.26[5774.13,11479.12]	-0.95[-1.02,-0.88]	45.91[7.22,107.29]	31.48[6.27,62.14]	-2.29[-3.1,-1.48]	973.22[667.77,1318.89]	741.43[535.57,976.96]	-0.89[-1.07,-0.71]	-10.05[-38.1,9.8]	-6.17[-23.62,10.13]	NS
